# Supplementary material
Source: PubMed Central journal article supplement (PMC8273040)

# Supplementary Information

## Supplementary Document S1. Search Strategy

### PubMed Search

#### A. Search 1 HCQ

1. HCQ OR Hydroxychloroquine OR + chloroquine OR CQ

#### B. Search COVID-19

2. COVID19 OR Coronavirus OR novel coronavirus OR SARS-CoV-2 OR COVID OR COVID-19

#### C. Combine 2 AND 3

#### C. Apply filters

-January 2020 – May 30 2020

- Systematic reviews, reviews, meta-analysis, clinical trial, randomized controlled trials and trials

Search: **HCQ OR Hydroxychloroquine OR chloroquine OR CQ** Filters: **Clinical Study, Meta-Analysis, Randomized Controlled Trial, Review, Systematic Reviews, in the last 1 year**

"HCQ"[All Fields] OR "hydroxychloroquine"[MeSH Terms] OR "hydroxychloroquine"[All Fields] OR "chloroquin"[All Fields] OR "chloroquine"[MeSH Terms] OR "chloroquine"[All Fields] OR "chloroquine s"[All Fields] OR "chloroquines"[All Fields] OR "crit q"[Journal] OR "cost qual"[Journal] OR "cost qual q j"[Journal] OR "commun q"[Journal] OR "caribb q"[Journal] OR "camb q healthc ethics"[Journal] OR "cq"[All Fields]

#### Translations

**Hydroxychloroquine:** "hydroxychloroquine"[MeSH Terms] OR "hydroxychloroquine"[All Fields]

**chloroquine:** "chloroquin"[All Fields] OR "chloroquine"[MeSH Terms] OR "chloroquine"[All Fields] OR "chloroquine's"[All Fields] OR "chloroquines"[All Fields]

**CQ:** "Crit Q"[Journal: \_\_jid101653381] OR "Cost Qual"[Journal: \_\_jid101126987] OR "Cost Qual Q J"[Journal: \_\_jid9602863] OR "Commun Q"[Journal: \_\_jid101580483] OR

"Caribb Q"[Journal: \_\_jid101553695] OR "Camb Q Healthc Ethics"[Journal: \_\_jid9208482] OR "cq"[All Fields]

Search: **COVID19 OR Coronavirus OR novel coronavirus OR SARS-CoV-2 OR COVID OR COVID-19** Filters: **Clinical Study, Meta-Analysis, Randomized Controlled Trial, Review, Systematic Reviews, in the last 1 year**

(((((("covid 19"[Supplementary Concept] OR "covid 19"[All Fields]) OR "covid19"[All Fields]) OR (("coronavirus"[MeSH Terms] OR "coronavirus"[All Fields]) OR "coronaviruses"[All Fields])) OR (((("novel"[All Fields] OR "novel s"[All Fields]) OR "novels"[All Fields]) AND (("coronavirus"[MeSH Terms] OR "coronavirus"[All Fields]) OR "coronaviruses"[All Fields]))) OR ((("severe acute respiratory syndrome coronavirus 2"[Supplementary Concept] OR "severe acute respiratory syndrome coronavirus 2"[All Fields]) OR "sars cov 2"[All Fields])) OR "COVID"[All Fields]) OR ((((((("covid 19"[All Fields] OR "covid 2019"[All Fields]) OR "severe acute respiratory syndrome coronavirus 2"[Supplementary Concept]) OR "severe acute respiratory syndrome coronavirus 2"[All Fields]) OR "2019 ncov"[All Fields]) OR "sars cov 2"[All Fields]) OR "2019ncov"[All Fields]) OR ((("wuhan"[All Fields] AND ("coronavirus"[MeSH Terms] OR "coronavirus"[All Fields])) AND (2019/12/1:2019/12/31[Date - Publication] OR 2020/1/1:2020/12/31[Date - Publication])))

### **Translations**

**COVID19:** "COVID-19"[Supplementary Concept] OR "COVID-19"[All Fields] OR "covid19"[All Fields]

**Coronavirus:** "coronavirus"[MeSH Terms] OR "coronavirus"[All Fields] OR "coronaviruses"[All Fields]

**novel:** "novel"[All Fields] OR "novel's"[All Fields] OR "novels"[All Fields]

**coronavirus:** "coronavirus"[MeSH Terms] OR "coronavirus"[All Fields] OR "coronaviruses"[All Fields]

**SARS-CoV-2:** "severe acute respiratory syndrome coronavirus 2"[Supplementary Concept] OR "severe acute respiratory syndrome coronavirus 2"[All Fields] OR "sars cov 2"[All Fields]

**COVID-19:** "COVID-19"[All Fields] OR "COVID-2019"[All Fields] OR "severe acute respiratory syndrome coronavirus 2"[Supplementary Concept] OR "severe acute respiratory syndrome coronavirus 2"[All Fields] OR "2019-nCoV"[All Fields] OR

"SARS-CoV-2"[All Fields] OR "2019nCoV"[All Fields] OR (("Wuhan"[All Fields] AND ("coronavirus"[MeSH Terms] OR "coronavirus"[All Fields])) AND (2019/12[PDAT] OR 2020[PDAT]))

## Scopus

TITLE-ABS-KEY(1. HCQ OR Hydroxychloroquine OR chloroquine OR CQ) AND (COVID19 OR Coronavirus OR novel coronavirus OR SARS-CoV-2 OR COVID OR COVID-19) AND (REVIEW OR SYSTEMATIC REVIEW OR META-ANALYSIS OR METAANALYSIS OR METAANALYSES OR RCT OR CLINICAL STUDY OR RANDOMIZED CONTROLLED TRIAL OR CLINICAL TRIAL) AND ( LIMIT-TO ( PUBYEAR,2020) )

## CINAHL

(HCQ OR Hydroxychloroquine OR chloroquine OR CQ) AND (COVID19 OR Coronavirus OR novel coronavirus OR SARS-CoV-2 OR COVID OR COVID-19) AND (REVIEW OR SYSTEMATIC REVIEW OR META-ANALYSIS OR METAANALYSIS OR METAANALYSES OR RCT OR CLINICAL STUDY OR RANDOMIZED CONTROLLED TRIAL OR CLINICAL TRIAL) AND ( LIMIT-TO ( PUBYEAR,2020) )

**Supplementary Table S2. Characteristics of excluded reviews**

| Study and year          | Date of publications | Title                                                                                       | Objective                                                                              | Design                 | Reason of exclusion                                    |
|-------------------------|----------------------|---------------------------------------------------------------------------------------------|----------------------------------------------------------------------------------------|------------------------|--------------------------------------------------------|
| Cortegiani et al., 2020 | 10-March-2020        | A systematic review on the efficacy and safety of chloroquine for the treatment of COVID-19 | To summarize the evidence regarding chloroquine for the treatment of COVID-19.         | Systematic review (SR) | Did not include completed clinical studies on COVID-19 |
| Zhu et al., 2020        | 17-March-2020        | Systematic Review of the Registered Clinical Trials of Coronavirus                          | To analyze the characteristics and existing problems of the registered clinical trials | Systematic review (SR) | Did not include completed clinical studies on COVID-19 |
| Singh et al., 2020      | 22-March-2020        | Chloroquine and hydroxychloroquine in the treatment of COVID-19 with or without             | The efficacy of chloroquine and hydroxychloroquine, in the                             | Narrative review       | Did not include completed                              |

|                       |               |                                                                                                                               |                                                                                                                                                                                                                                                                         |                        |                                                                                |
|-----------------------|---------------|-------------------------------------------------------------------------------------------------------------------------------|-------------------------------------------------------------------------------------------------------------------------------------------------------------------------------------------------------------------------------------------------------------------------|------------------------|--------------------------------------------------------------------------------|
|                       |               | diabetes: A systematic search and a narrative review with a special reference to India and other developing countries         | treatment of participants with COVID19                                                                                                                                                                                                                                  |                        | clinical studies on COVID-19<br><br>Narrative review                           |
| Kapoor et al., 2020   | 30-March-2020 | Role of Chloroquine and Hydroxychloroquine in the Treatment of COVID-19 Infection- A Systematic Literature Review             | To summarize the available evidence regarding the role of chloroquine in treating coronavirus infection.                                                                                                                                                                | Systematic review (SR) | Did not include completed clinical studies on COVID-19                         |
| Gbinigie et al., 2020 | 7-April-2020  | Should chloroquine and hydroxychloroquine be used to treat COVID-19? A rapid review                                           | To establish the current evidence for the effectiveness of CQ and HCQ in treating COVID-19 infection                                                                                                                                                                    | Narrative review       | Narrative review<br><br>Did not include completed clinical studies on COVID-19 |
| Pastick et al., 2020  | 13-April-2020 | Review: Hydroxychloroquine and Chloroquine for Treatment of SARS-CoV-2 (COVID-19)                                             | A review of all the available evidence of safety and efficacy of HCQ & CQ                                                                                                                                                                                               | Narrative review       | Narrative review                                                               |
| Shukla et al., 2020   | 28-April-2020 | Chloroquine and hydroxychloroquine in the context of COVID-19                                                                 | To present the available in vitro and clinical data for the role of chloroquine/ hydroxychloroquine in COVID-19 and attempts to put them into perspective, especially in relation to the different risks/benefits particular to each patient who may require treatment. | Narrative review       | Narrative review                                                               |
| Hashem et al., 2020   | 29-April-2020 | Therapeutic use of chloroquine and hydroxychloroquine in COVID-19 and other viral infections: A narrative review              | To comprehensively review previous studies which used CQ or HCQ as an antiviral treatment.                                                                                                                                                                              | Narrative review       | Narrative review                                                               |
| Patil et al., 2020    | 11-May-2020   | A systematic review on use of aminoquinoline for the therapeutic management of COVID-19: Efficacy, safety and clinical trials | Provides a systematic review of mechanism of action, efficacy, and safety of chloroquine and hydroxychloroquine which are being used as therapeutic measure to cure COVID-19 infection.                                                                                 | Systematic review (SR) | Did not include completed clinical studies on COVID-19                         |



**Supplementary Table S4: Characteristics of Excluded Primary Studies**

| Study and date of publication      | Country       | Reviews                         | Reason for exclusion                                   |
|------------------------------------|---------------|---------------------------------|--------------------------------------------------------|
| Bessière et al., (1-May-2020)      | France        | 8                               | Observational studies                                  |
| Borba et al., (24-April-2020)      | Brazil        | 6, 8, 11, 12                    | Comparison between two different doses of CQ (not SOC) |
| Carlucci et al., (8-May-2020)      | USA           | 9                               | Observational study                                    |
| Chorin et al., (1-May-2020)        | USA and Italy | 8                               | Observational study                                    |
| Chorin et al., (3-April-2020)      | USA           | 2, 4, 8, 9, 11, 12,             | Observational study                                    |
| Gao et al., (16-March-2020)        | China         | 7, 13                           | No data presented                                      |
| Gautret et al., (11-April-2020)    | France        | 1, 2, 3, 4, 8, 9,<br>10, 12, 13 | Observational study                                    |
| Geleris et al., (7-May-2020)       | USA           | 4, 7, 8, 9, 10, 11              | Observational study                                    |
| Huang et al., (4-May-2020)         | China         | 8                               | Observational study                                    |
| Ip et al., (25-May-2020)           | USA           | 11                              | Observational study                                    |
| Jiang et al., (12-July-2020)??     | China         | 13                              | No full text - abstract only                           |
| Kim et al., (18-May-2020)          | South Korea   | 9, 11                           | Observational study                                    |
| Lee et al., (8-May-2020)           | South Korea   | 9                               | Observational study                                    |
| Magnagnoli et al., (23-April-2020) | USA           | 3, 4, 5, 7, 8, 9,<br>10, 11,    | Observational study                                    |
| Mallat et al., (2-May-2020)        | UAE           | 7, 8, 9, 11                     | Observational study                                    |
| Mehra et al., (22-May-2020)        | USA           | 9, 11                           | Observational study which was retracted                |
| Membrillo et al., (9-May-2020)     | Spain         | 8, 9                            | Observational study                                    |
| Mercuro et al., (1-May-2020)       | USA           | 8, 10, 11                       | Observational study                                    |
| Million et al., (5-May-2020)       | France        | 1, 3, 9, 10, 11,<br>12, 13      | Observational study                                    |
| Molina et al., (17-April-2020)     | France        | 1, 3, 4, 8, 9, 10,<br>12, 13    | No control group                                       |
| Okour et al., (13-May-2020)        | USA           | 9                               | Duplicate data                                         |
| Perinel et al., (7-April-2020)     | France        | 12                              | Observational study                                    |
| Ramireddy et al., (25-April-2020)  | USA           | 8, 9, 10, 11                    | Case series                                            |
| Raoult et al., (11-April-2020)     | France        | 8                               | Case series                                            |
| Regina et al., (12-May-2020)       | Switzerland   | 9                               | Observational study                                    |



|                                                                                                                                                                      |   |   |   |   |     |   |   |   |
|----------------------------------------------------------------------------------------------------------------------------------------------------------------------|---|---|---|---|-----|---|---|---|
| 2. Participants in all comparison groups were from the same population and timeframe                                                                                 | 1 | 1 | 0 | 1 | 1   | 1 | 1 | 1 |
| 3. Inclusion/ exclusion criteria specified and applied equally to all groups prior to group assignment                                                               | 1 | 1 | 0 | 1 | 1   | 1 | 1 | 1 |
| 4. Any attrition (or exclusions after entry) is less than 20% of total participant numbers                                                                           | 1 | 1 | 0 | 1 | 1   | 1 | 1 | 1 |
| 5. Missing data is less than 20%                                                                                                                                     | 1 | 1 | 1 | 1 | 1   | 1 | 1 | 1 |
| 6. Analysis accounted for missing data                                                                                                                               | 1 | 1 | 0 | 1 | 1   | 1 | 1 | 1 |
| 7. Treatment deviations or non-compliance/ non-adherence were less than 20%                                                                                          | 1 | 1 | 1 | 1 | 1   | 1 | 1 | 1 |
| 8. Analysis accounted for treatment deviations/ withdrawals                                                                                                          | 1 | 1 | 0 | 1 | 1   | 1 | 1 | 1 |
| 9. Procedures for data collection of covariates were reliable and the same for all participants                                                                      | 1 | 1 | 0 | 1 | 1   | 1 | 1 | 1 |
| 10. Outcome was objectively defined                                                                                                                                  | 1 | 1 | 1 | 1 | 1   | 1 | 1 | 1 |
| 11. Analyst was blinded                                                                                                                                              | 0 | 1 | 0 | 1 | 1   | 1 | 0 | 0 |
| 12. Outcome assessor(s) were blinded                                                                                                                                 | 0 | 1 | 0 | 0 | 0   | 0 | 1 | 0 |
| 13. Participants were blinded                                                                                                                                        | 0 | 1 | 0 | 0 | 0   | 0 | 0 | 0 |
| 14. Caregivers were blinded                                                                                                                                          | 0 | 1 | 0 | 0 | 0   | 1 | 0 | 0 |
| 15. Exposures/ interventions were objectively defined                                                                                                                | 1 | 1 | 1 | 1 | 1   | 1 | 1 | 1 |
| 16. Care was delivered equally to all participants                                                                                                                   | 1 | 1 | 0 | 1 | 1   | 1 | 1 | 1 |
| 17. Cointerventions that could impact the outcome were comparable between groups or avoided                                                                          | 1 | 1 | 0 | 1 | 1   | 1 | 1 | 1 |
| 18. Control and active interventions/ exposures are sufficiently distinct                                                                                            | 1 | 1 | 1 | 1 | 1   | 1 | 1 | 1 |
| 19. Exposure/intervention definition consistently applied to all participants                                                                                        | 1 | 1 | 1 | 1 | 1   | 1 | 1 | 1 |
| 20. Outcome definition consistently applied to all participants                                                                                                      | 1 | 1 | 1 | 1 | 1   | 1 | 1 | 1 |
| 21. The time period between exposure and outcome is similar across patients and between groups or the analyses adjust for different lengths of follow-up of patients | 1 | 1 | 1 | 1 | 1   | 1 | 1 | 1 |
| 22. Design features in place that account for confounding                                                                                                            | 1 | 1 | 0 | 1 | 1   | 1 | 1 | 1 |
| 23. Analytic strategies in place for key confounders                                                                                                                 | 0 | 0 | 0 | 1 | 0.5 | 1 | 0 | 1 |
| 24. Key baseline characteristics / prognostic indicators for the study were comparable across groups                                                                 | 1 | 1 | 0 | 1 | 0.5 | 1 | 1 | 1 |
| 25. Allocation procedure was adequately concealed                                                                                                                    | 1 | 0 | 0 | 0 | 0   | 1 | 1 | 0 |



|                                                                                                                 |    |    |    |    |     |    |    |    |
|-----------------------------------------------------------------------------------------------------------------|----|----|----|----|-----|----|----|----|
| 26. Conflict of interests were declared and absent                                                              | 0  | 1  | 1  | 1  | 1   | 1  | 1  | 1  |
| 27. Participants were randomly allocated to groups with adequate randomisation process                          | 1  | 1  | 0  | 1  | 0.5 | 1  | 1  | 1  |
| 28. Analytic method was justified by study design                                                               | 1  | 1  | 0  | 1  | 0.5 | 1  | 1  | 1  |
| 29. Computation errors or contradictions were absent                                                            | 1  | 1  | 1  | 1  | 1   | 1  | 1  | 1  |
| 30. There was no data dredging or selective reporting of the outcome                                            | 1  | 1  | 1  | 1  | 1   | 1  | 1  | 1  |
| 31. All subjects were selected prior to intervention/exposure and evaluated prospectively                       | 1  | 1  | 0  | 1  | 1   | 1  | 1  | 1  |
| 32. Carry-over or refractory effects were avoided or considered in the design of the study or were not relevant | 1  | 1  | 1  | 1  | 1   | 1  | 1  | 1  |
| 33. The intervention/ exposure period was long enough to have influenced the study outcome                      | 1  | 1  | 1  | 1  | 1   | 1  | 1  | 1  |
| 34. Dose of intervention/ exposure was sufficient to influence the outcome                                      | 1  | 1  | 1  | 1  | 1   | 1  | 1  | 1  |
| 35. Length of follow-up was not too long or too short in relation to the outcome assessment                     | 1  | 1  | 1  | 1  | 1   | 1  | 1  | 1  |
| Summary count of safeguard items                                                                                | 29 | 33 | 16 | 31 | 29  | 33 | 31 | 30 |

## Supplementary Fig. 1: Quality Assessment

### A: AMSTAR Assessment for Included Reviews

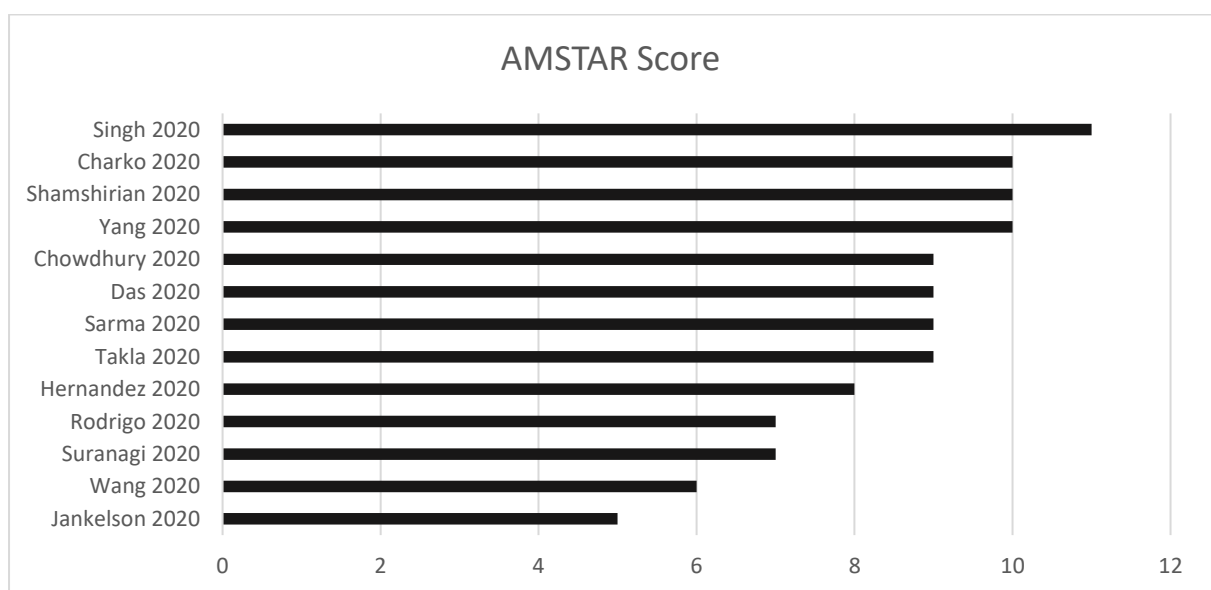

### B: MASTER for experimental studies

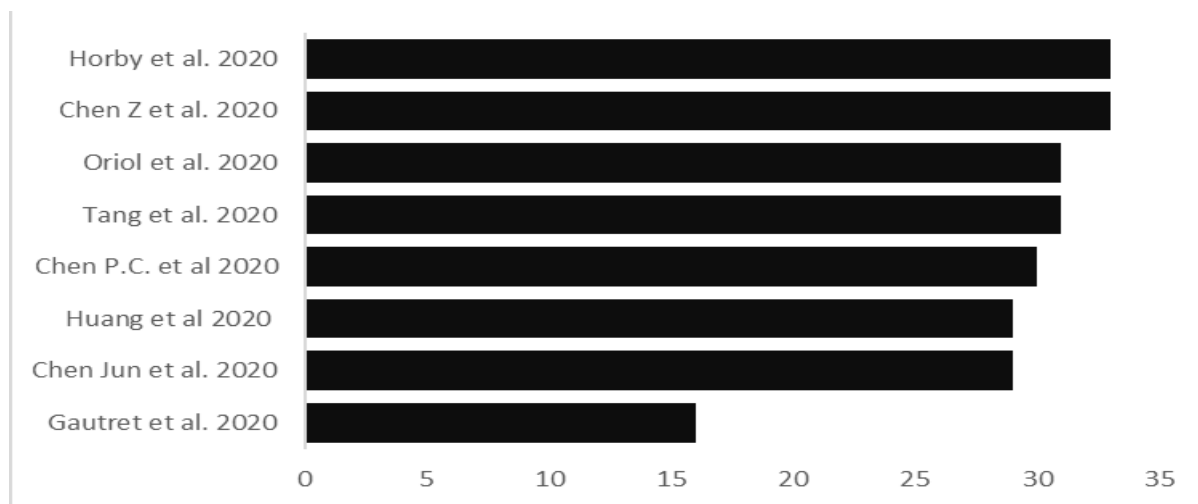

**Supplementary Table S6. Outcomes of Included reviews**

| Author, date & design             | Drug    | Mortality                                                                    | ICU, intubation                                                                                    | Virological Cure                                                                                | Disease worsening                                                                             | Adverse events                                                                                                                                                                                             |
|-----------------------------------|---------|------------------------------------------------------------------------------|----------------------------------------------------------------------------------------------------|-------------------------------------------------------------------------------------------------|-----------------------------------------------------------------------------------------------|------------------------------------------------------------------------------------------------------------------------------------------------------------------------------------------------------------|
| Shamshirian (28 May 2020)<br>SRMA | HCQ     | No significant difference in mortality (RR: 1.13, 95%CI 0.71 - 1.80)         | Intubation - no significant differences HCQ - OR: 2.11, 95% CI, 0.31-14.03, I <sup>2</sup> =75.6%) | HCQ - No effectiveness (RR: 0.96, 95% CI, 0.76-1.22), (RD: 0.00, 95% CI, - 0.18-0.18)           | No considerable disease exacerbation difference HCQ (RR: 0.59, 95% CI, 0.04-7.79)             | Higher risk of events HCQ (OR: 4.01, 95% CI, 1.17-13.84)                                                                                                                                                   |
|                                   | HCQ+AZI | Higher mortality in HCQ+AZI (RR 2.46, 95% CI 1.4-4.3)                        | -                                                                                                  | HCQ +AZI - No significant difference with control (RR 2.15, 95%CI 0.31 - 14.77)                 |                                                                                               |                                                                                                                                                                                                            |
| Chacko (20 May 2020)<br>SRMA      | HCQ     | No significant difference in mortality (OR: 1.41, 95% CI: 0.76 - 2.62)       | -                                                                                                  | No significant different between the HCQ and control groups (OR: 1.13, CI: 0.26-5.01; p = 0.87) | No difference in clinical worsening (OR 1.1, 95% CI: 0.6-2.02).                               | Higher risk of adverse events in HCQ arm (OR: 4.1, CI: 1.42 - 11.88; p = 0.009)                                                                                                                            |
| Yang (14 May 2020)<br>SRMA        | HCQ+AZI | Increased mortality in HCQ +/- AZI (OR 2.5 (95% CI 1.4 - 4.5)                | -                                                                                                  | No difference between HCQ alone vs. control (OR = 1.74 95% CI 0.51 - 5.91)                      | No significant difference between HCQ alone versus Control (OR = 1.37, 95% CI 0.09 - 21.97)   |                                                                                                                                                                                                            |
|                                   | HCQ     | HCQ alone was associated with increased mortality (OR 2.98 (95%CI 1.6 - 5.7) | -                                                                                                  | No difference between HCQ with or without AZI vs control (OR = 1.95, 95% CI 0.19 - 19.73)       | No difference between HCQ+AZI versus Control (OR = 1.00, 95% CI 0.27 - 3.75)                  |                                                                                                                                                                                                            |
| Singh (7 May 2020)<br>SRMA        | HCQ     | Higher mortality in HCQ arm (RR, 2.17; 95% 1.32 to 3.57)                     | No difference in transfer to the ICU (20.2 vs 22.1%; RR 0.91, 0.47-1.80)                           | No benefit with HCQ (RR, 1.05; 95% CI, 0.79 to 1.38; p=0.74)                                    | Improvement in pneumonia with HCQ (80.6 vs 54.8%, p=0.048), chest CT with HCQ (61.3 vs 16.1%) | 1 study reported no adverse events. 1 reported no cardiac toxicity although it did not report how they assessed this. 7 other studies reported moderate to large increases in occurrence of adverse events |

|                               |         |                                                                                                                                                 |                                                                                                 |                                                                                                                                                                   |                                                                                                                                                                                                                                                                             |                                                                                                                                                                                                                                                      |
|-------------------------------|---------|-------------------------------------------------------------------------------------------------------------------------------------------------|-------------------------------------------------------------------------------------------------|-------------------------------------------------------------------------------------------------------------------------------------------------------------------|-----------------------------------------------------------------------------------------------------------------------------------------------------------------------------------------------------------------------------------------------------------------------------|------------------------------------------------------------------------------------------------------------------------------------------------------------------------------------------------------------------------------------------------------|
| Sarma (13 April 2020)<br>SRMA | HCQ     | No difference in death or clinical worsening between treatment and control group (OR, 1.37, 95% CI, 0.09-21.97)                                 | -                                                                                               | No difference in virological cure 2.37; 95% CI, [0.13-44.53]                                                                                                      | 2 studies found shorter time for body temperature normalization and the number of cough days. 3 studies reported no difference in clinical worsening OR, 1.37 (95% CI, 0.09-21.97).                                                                                         | Reported adverse events but No significant difference on all studies (OR, 2.19; 95% CI, [0.59-8.18])                                                                                                                                                 |
|                               | HCQ+AZI |                                                                                                                                                 | -                                                                                               | Higher virological cure in 1 study while others reported moderate effect of the combination                                                                       | -                                                                                                                                                                                                                                                                           | Reported adverse events and QTc prolongation. 1 study found no signs of cardiac toxicity                                                                                                                                                             |
| Wang (1 June 2020)<br>SR      | HCQ-AZI | One study had no deaths, second study had lower mortality in HCQ-AZ group, but was statistically non-significant.                               | Marginally lower percentage in HCQ were transferred to ICU but differences were not significant | -                                                                                                                                                                 | HCQ improved pneumonia: 80.6% vs 54.8%; (1 study), CQ reduced exacerbation of pneumonia, improved lung imaging, promoted virological clearance, and shortened disease course. Poor clinical outcome significantly associated with greater severity (OR 10.05) in one study. | More adverse events in HCQ and CQ than control like QTc interval prolongation. 2 studies reported no serious adverse events                                                                                                                          |
| Takla (30 May 2020)<br>SR     | CQ/HCQ  | 60% of studies reported no difference on mortality, 30% reported higher mortality in the HCQ group, 10% reported reduced mortality in HCQ group | No difference in need for mechanical ventilation, and transfer to an intensive care unit        | 67% of studies showed significant higher viral clearance, 33% no difference                                                                                       | -                                                                                                                                                                                                                                                                           | A higher probability of adverse events in 82% of the studies                                                                                                                                                                                         |
| Das (28 May 2020)<br>SR       | HCQ     | Reported no significant effect of HCQ on death                                                                                                  | Reported no significant effect of HCQ on intubation                                             | 5 studies (1269 participants) reported good virological and clinical outcomes in the HCQ arm<br>5 studies (808 participants) showed negative or equivocal results | Reported "good virological and clinical outcomes in the HCQ arm"                                                                                                                                                                                                            | 4 studies (1207 participants) reported HCQ as safe with mild adverse events. 2 studies (101 participants) reported QT prolongation associated with HCQ treatment<br>5 studies (859 participants) reported HCQ associated with serious adverse events |

|                                 |           |                                                                                                                                                      |                                                                                                                                                                                                      |                                                                                                                                                                                                           |                                                                                                                                                                                                                                                              |                                                                                                                                                                                                                                                   |
|---------------------------------|-----------|------------------------------------------------------------------------------------------------------------------------------------------------------|------------------------------------------------------------------------------------------------------------------------------------------------------------------------------------------------------|-----------------------------------------------------------------------------------------------------------------------------------------------------------------------------------------------------------|--------------------------------------------------------------------------------------------------------------------------------------------------------------------------------------------------------------------------------------------------------------|---------------------------------------------------------------------------------------------------------------------------------------------------------------------------------------------------------------------------------------------------|
| Hernandez (27 May 2020)<br>SR   | HCQ<br>CQ | 1 study reported no deaths, 2 studies found decreases in mortality, 2 found no change in mortality, 4 found moderate to large increases in mortality | 2 studies reported CQ/HCQ had increased need for ICU admission, intubation and/ mechanical ventilation. 3 studies reported no effect of CQ/HCQ on ICU, intubation or need for mechanical ventilation | 2 studies reported moderate to large increases in virologic clearance for the CQ/HCQ arm. 3 studies found no difference or effect. 1 study found large decreases of virologic clearance in the CQ/HCQ arm | 1 study reported increased progression of the disease (progressing to need respiratory support), 1 study reported fewer participants in HCQ had disease progression and others had 1.0- and 1.1-day reduction in fever and cough. 3 studies found no effect. | 6 studies reported modest to large increase in adverse events and QTc prolongation in HCQ alone and HCQ+AZI group. 1 study reported both in adverse events and 1 study reported no difference and insufficient evidence of risk of adverse events |
| Rodrigo (16 May 2020)<br>SR     | CQ<br>HCQ | Mortality higher in higher dose of CQ arm (15% vs 39%, p=0.03)                                                                                       | -                                                                                                                                                                                                    | No statistically significant difference by day 14 of illness (10/10 in CQ group vs. 11/12 in Lopinavir). The other study terminated early                                                                 | -                                                                                                                                                                                                                                                            | -                                                                                                                                                                                                                                                 |
|                                 |           |                                                                                                                                                      |                                                                                                                                                                                                      | 3 studies reported no statistical difference in clearance of viremia 1 study reported statistical significance (70% in HCQ group vs. 12.5% in placebo group, p=0.001)                                     | -                                                                                                                                                                                                                                                            | -                                                                                                                                                                                                                                                 |
| Suranagi (13 May 2020)<br>SR    | HCQ       | HCQ increased risk of death                                                                                                                          | 1 study reported intubations, but No significant effect of HCQ on risk of either mechanical ventilation or intubation                                                                                | 3 studies reported HCQ reduced viral load and effect reinforced by Azithromycin. 1 study reported no effect on viral clearance                                                                            | HCQ reduced duration of illness and improved pneumonia and pulmonary image changes                                                                                                                                                                           | -                                                                                                                                                                                                                                                 |
| Chowdhury (28 April 2020)<br>SR | CQ<br>HCQ | -                                                                                                                                                    | -                                                                                                                                                                                                    | Better virological clearance in the CQ/HCQ arm than control (standard care/Lopinavir/ritonavir arm).                                                                                                      | Improved pneumonia per chest CT and reduced progression to severe illness. 2 studies reported no significant difference in alleviating or increasing severity of disease                                                                                     | Adverse effects CQ arm but not in Lopinavir/ritonavir arm, (n= 1 study), HCQ arm (Adverse events: 30% vs 8.8 %). 1 study found some minor adverse events in HCQ arm. 1 study sound no significant difference on adverse events between groups.    |
| Jankelson (31 May 2020)<br>SR   | CQ/HCQ    | -                                                                                                                                                    | -                                                                                                                                                                                                    | -                                                                                                                                                                                                         | -                                                                                                                                                                                                                                                            | QTc prolongation in 40 participants<br><br>Ventricular arrhythmia reported in 2 participants, first degree AV                                                                                                                                     |

|  |  |  |  |  |  |                                                  |
|--|--|--|--|--|--|--------------------------------------------------|
|  |  |  |  |  |  | block developed in 1 and LBBB in another patient |
|--|--|--|--|--|--|--------------------------------------------------|

### Supplementary Table S7. Limitations and conclusions from reviews

| Author name & date        | Review Conclusion                                                                                                                                                   | Limitations of the review                                                                                       |
|---------------------------|---------------------------------------------------------------------------------------------------------------------------------------------------------------------|-----------------------------------------------------------------------------------------------------------------|
| Shamshirian (28 May 2020) | No clinical benefits regarding HCQ treatment with/without azithromycin for COVID-19 participants                                                                    | Few included studies (6 studies) with small sample sizes in the meta-analysis                                   |
| Chacko (20 May 2020)      | Meta-analysis does not support the treatment of COVID-19 infection with HCQ                                                                                         | Small studies, small sample sizes, different outcome measurements and endpoints measured at different intervals |
| Yang (14 May 2020)        | HCQ with or without AZI are beneficial for treatment of COVID-19 participants, but may also have higher mortality                                                   | Few included studies with small sample sizes.                                                                   |
| Singh (7 May 2020)        | While no benefit on viral clearance demonstrated by HCQ, a significant 2-fold increase in mortality with the HCQ warrants its use, if at all, with extreme caution. | Small number of participants overall, combining the results of RCT with other non-randomized studies.           |
| Sarma (13 April 2020)     | Treatment with HCQ may result in reducing radiological progression with comparable safety                                                                           | Few studies, small sample sizes, and several studies without controls                                           |
| Wang (1 June 2020)        | No solid evidence supporting the efficacy and safety of HCQ and CQ as a treatment for COVID-19 with or without azithromycin                                         | Search not comprehensive, only searched 2 English databases, few studies with small sample sizes                |
| Jankelson (31 May 2020)   | Compelling evidence that CQ & HCQ induce significant QTc prolongation and can be potential risk factors of arrhythmia.                                              | Small number of studies, small sample sizes. Efficacy outcomes not part of scope of review                      |
| Takla (30 May 2020)       | Relative to standard in-hospital management of symptoms, the use of CQ and HCQ to treat hospitalised COVID-19 has likely been unsafe                                | Data synthesize by describing percentage of studies with outcome not optimal                                    |
| Das (28 May 2020)         | Inconclusive evidence of HCQ efficacy and safety                                                                                                                    | Lack of data from well-designed RCTs                                                                            |
| Hernandez (27 May 2020)   | Insufficient and often conflicting evidence on the benefits and harms of using hydroxychloroquine or chloroquine to treat COVID-19.                                 | There were few controlled studies, and control for confounding was inadequate in observational studies.         |
| Rodrigo (16 May 2020)     | Role of CQ & HCQ in covid19 is yet unclear and needs to be assessed by well-designed double-blind clinical trails                                                   | Small number of studies that were not similar hence a meta-analysis was not performed                           |
| Suranagi (13 May 2020)    | Current evidence stands inadequate to support the use of hydroxychloroquine in pharmacotherapy of COVID-19                                                          | Small studies with weak study designs                                                                           |
| Chowdhury (28 April 2020) | No enough data to support the routine use of either HCQ or CQ for treatment of COVID19                                                                              | Narrative review. Indiscriminate inclusion criteria                                                             |

## Random Effects Models

### Mortality – random effects model

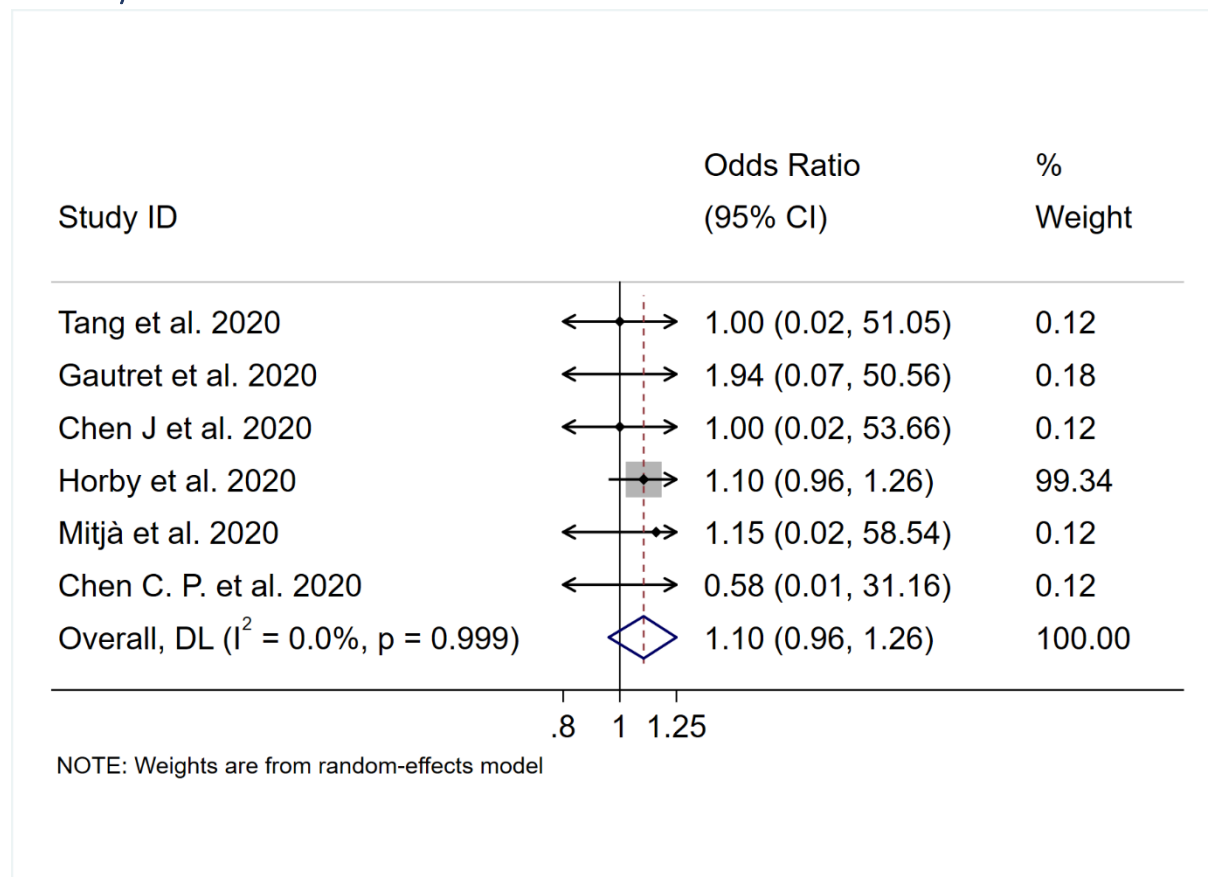

### Mortality – excluding Horby et al. (2020)

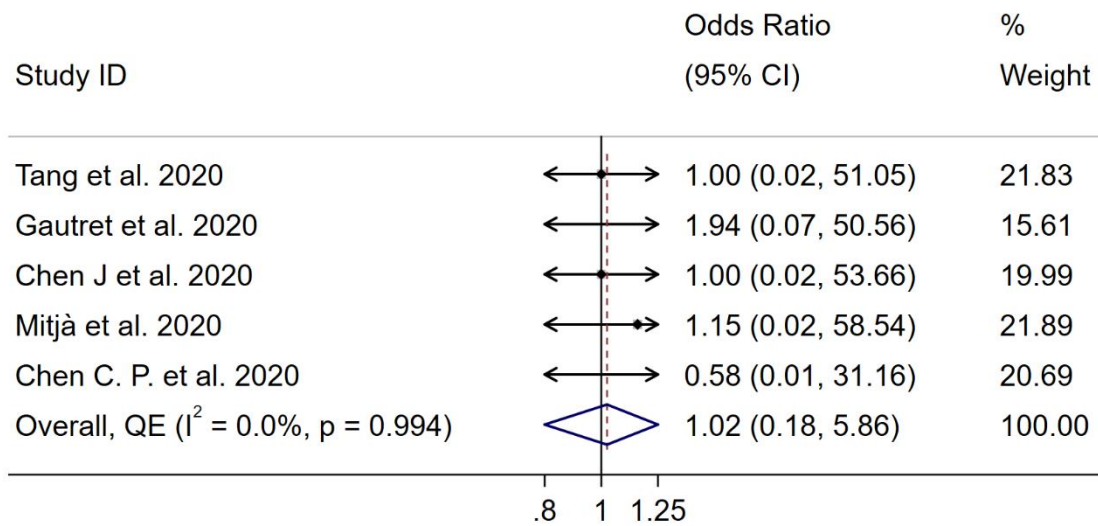

NOTE: Weights are from Doi's Quality Effects model

## ICU – random effects model

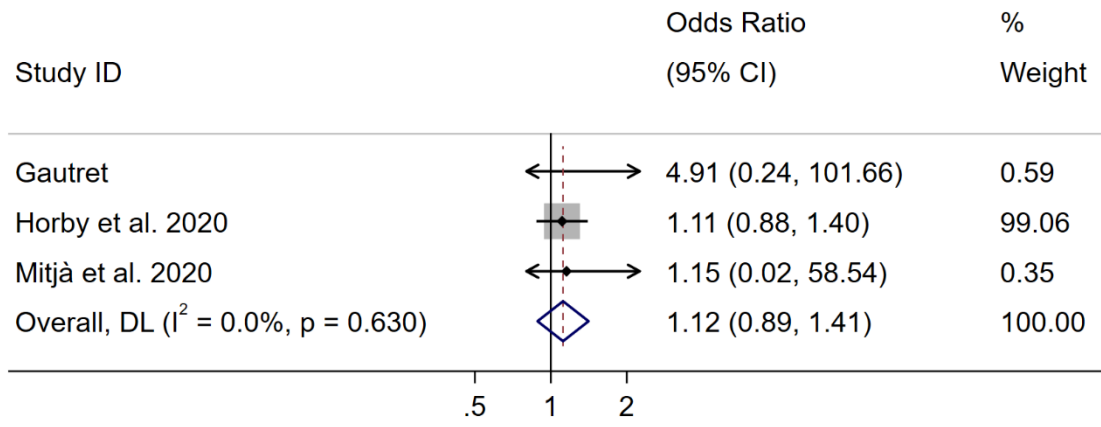



### Virological cure – random effects

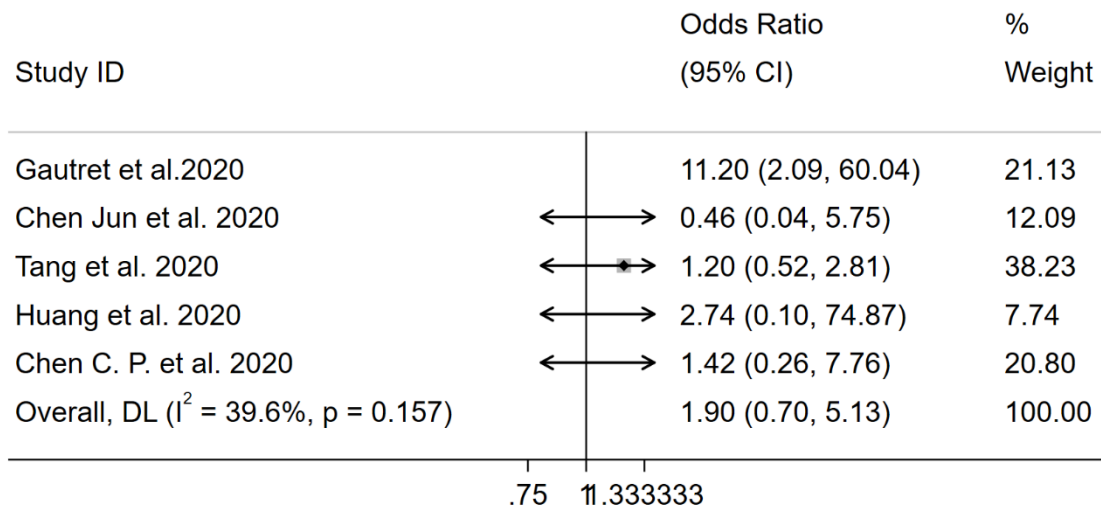

NOTE: Weights are from random-effects model; continuity correction applied to studies with zero cells

## Virological cure – without Gautret

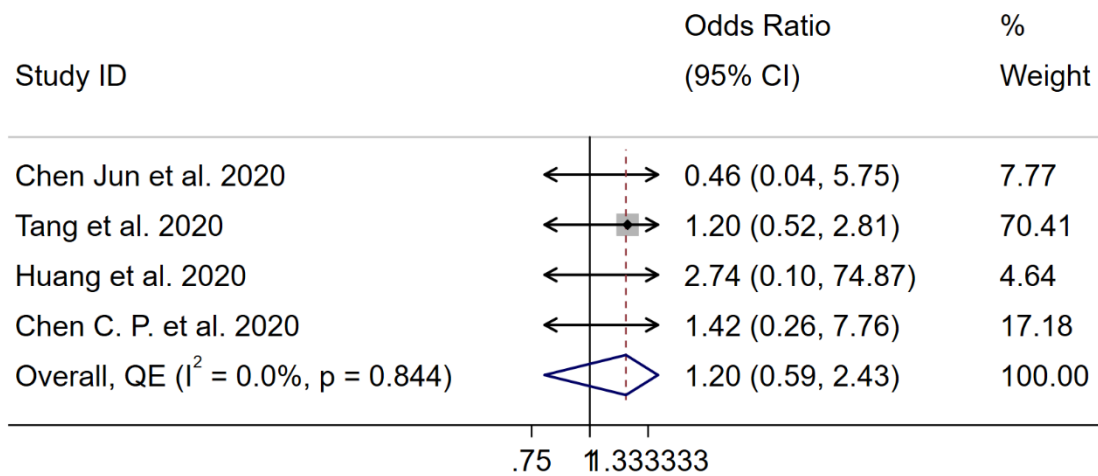

NOTE: Weights are from Doi's Quality Effects model; continuity correction applied to studies with zero cells

## Disease worsening - random effects model

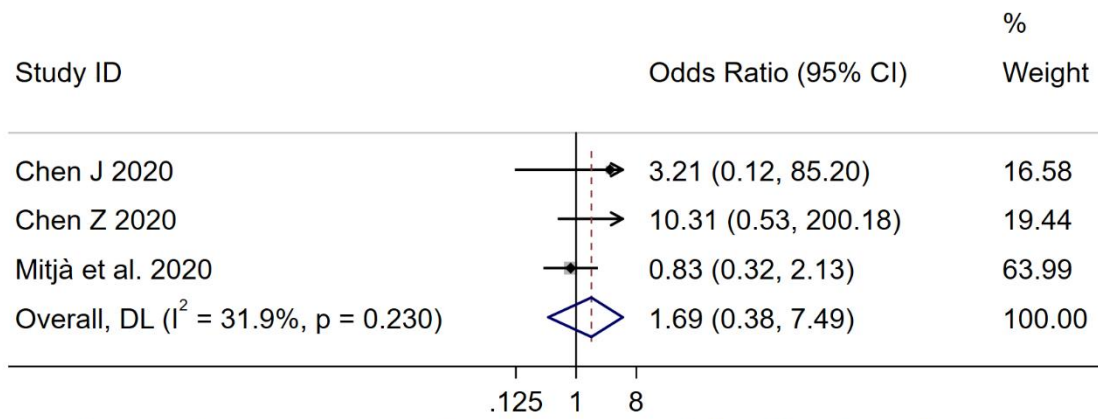

### Adverse events – random effects

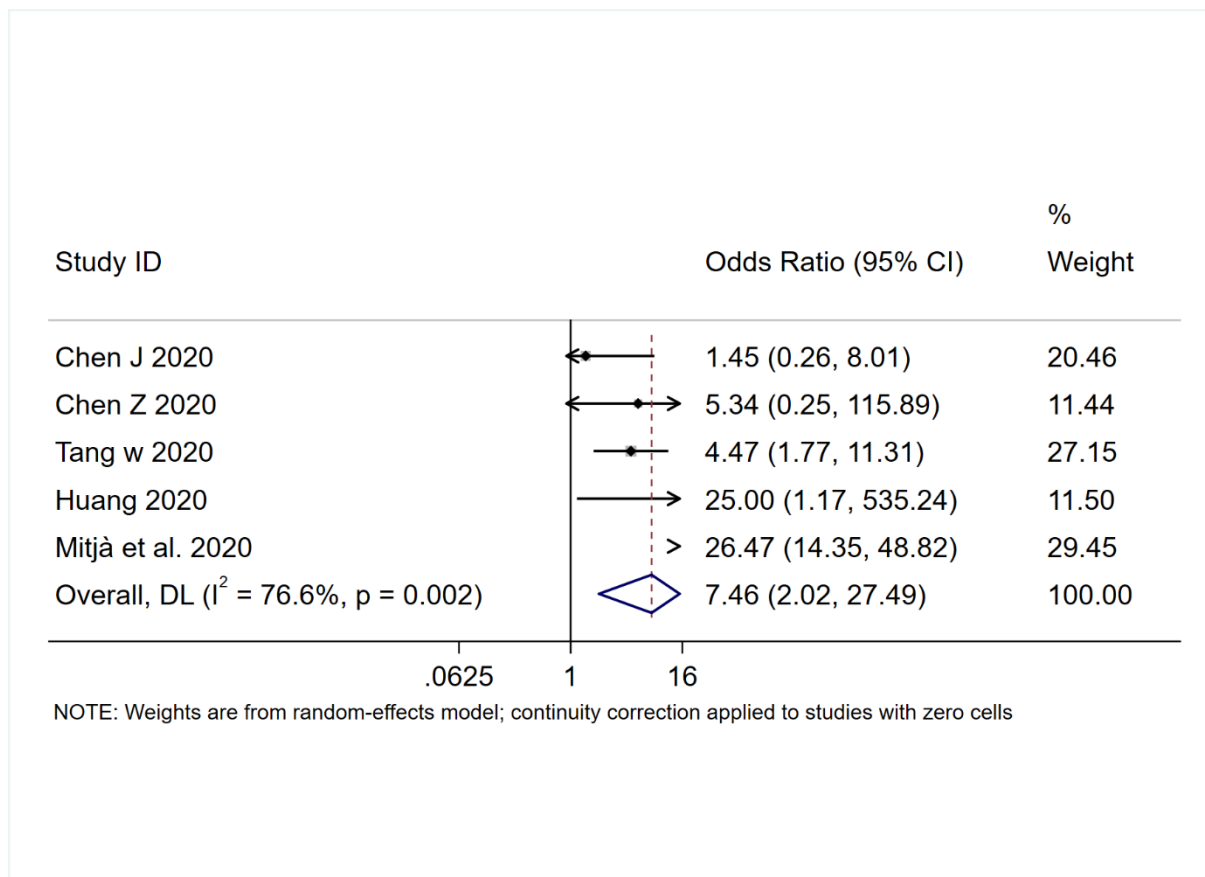

**Supplementary Fig. 3: Doi Plots and LFK Index**

3A: Mortality

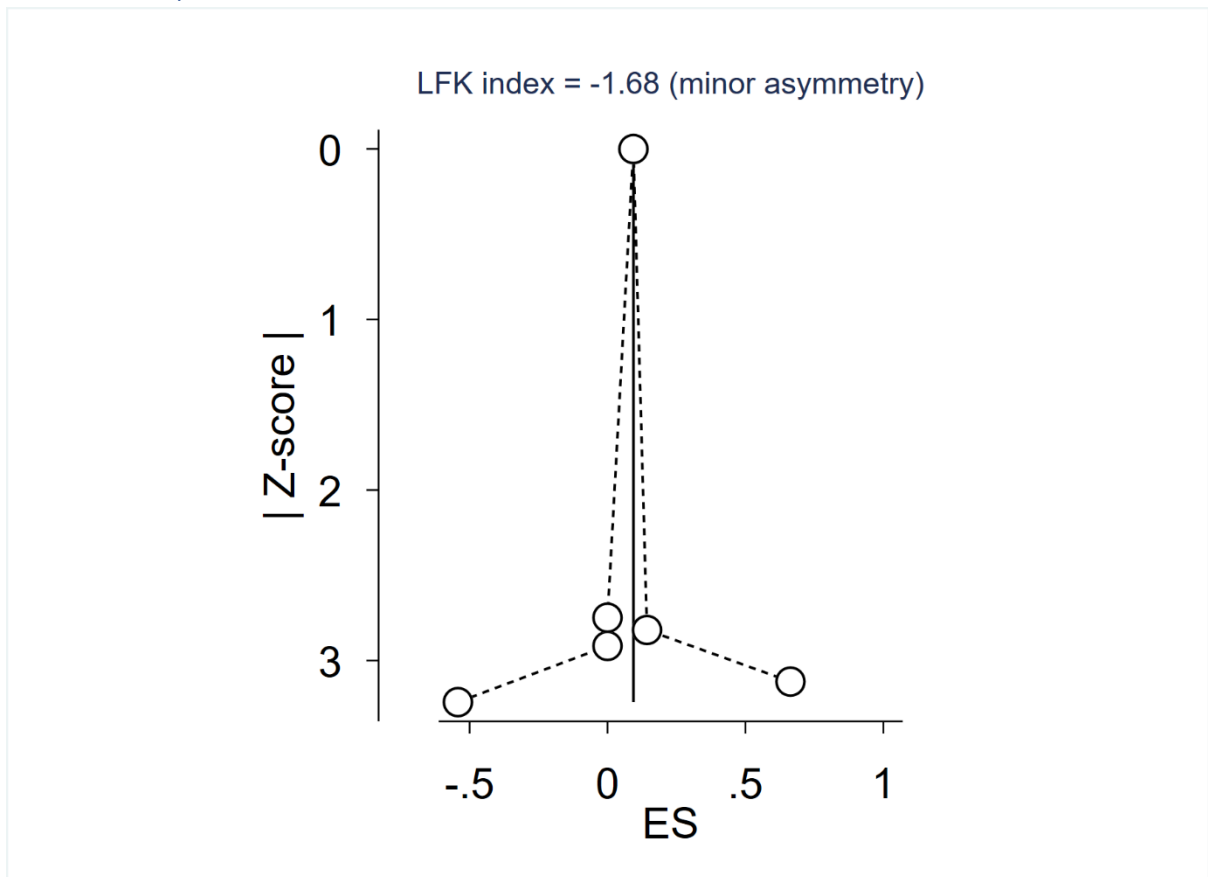

3B: ICU Admission

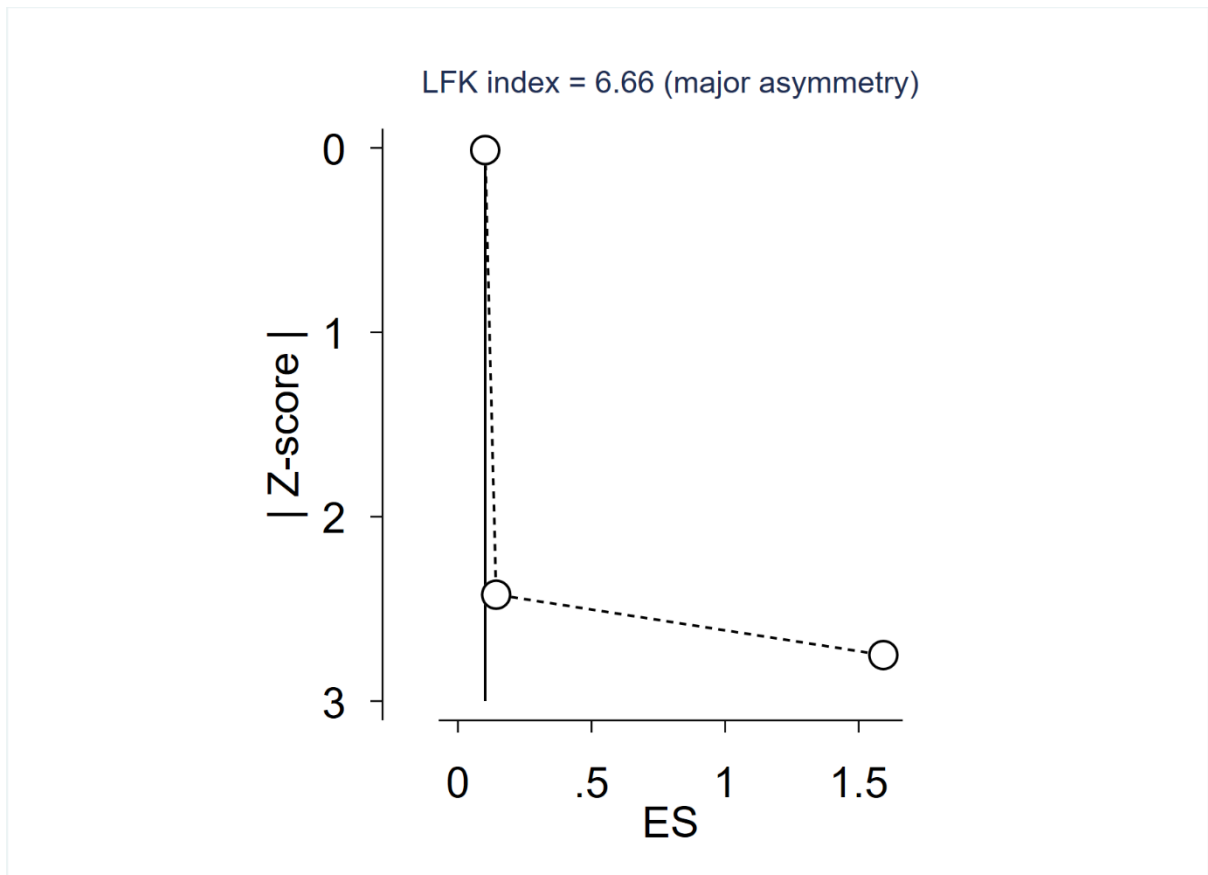

### 3C: Virological cure

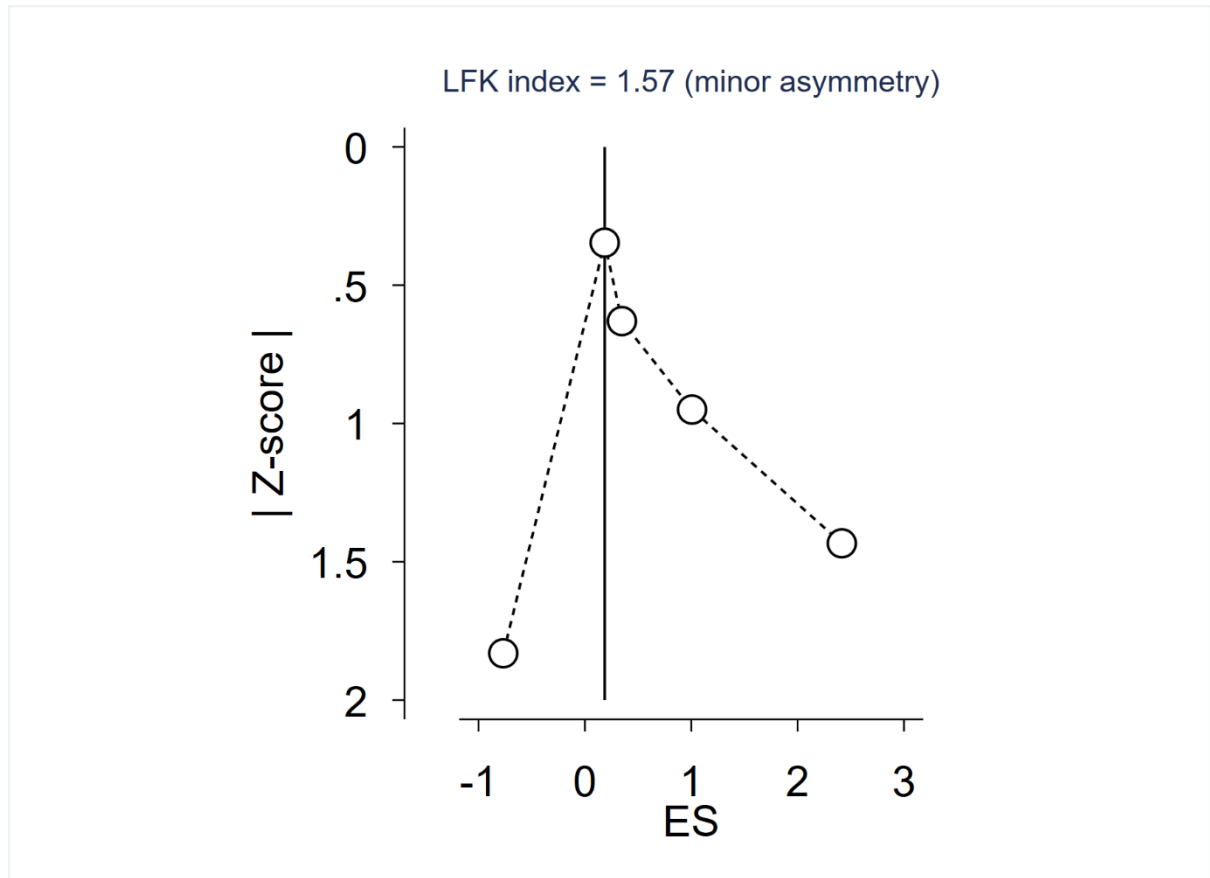

### 3D: Disease Exacerbation

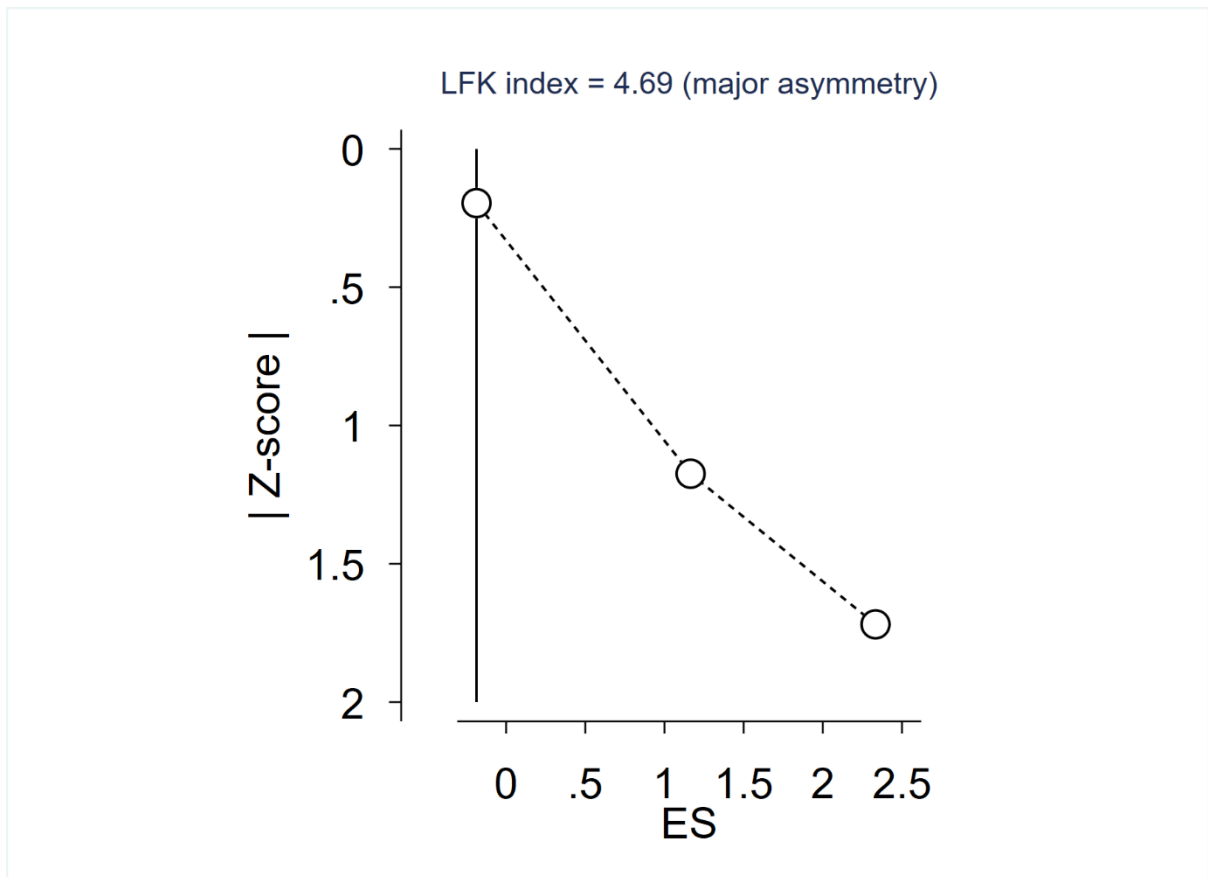

### 3E: Adverse events

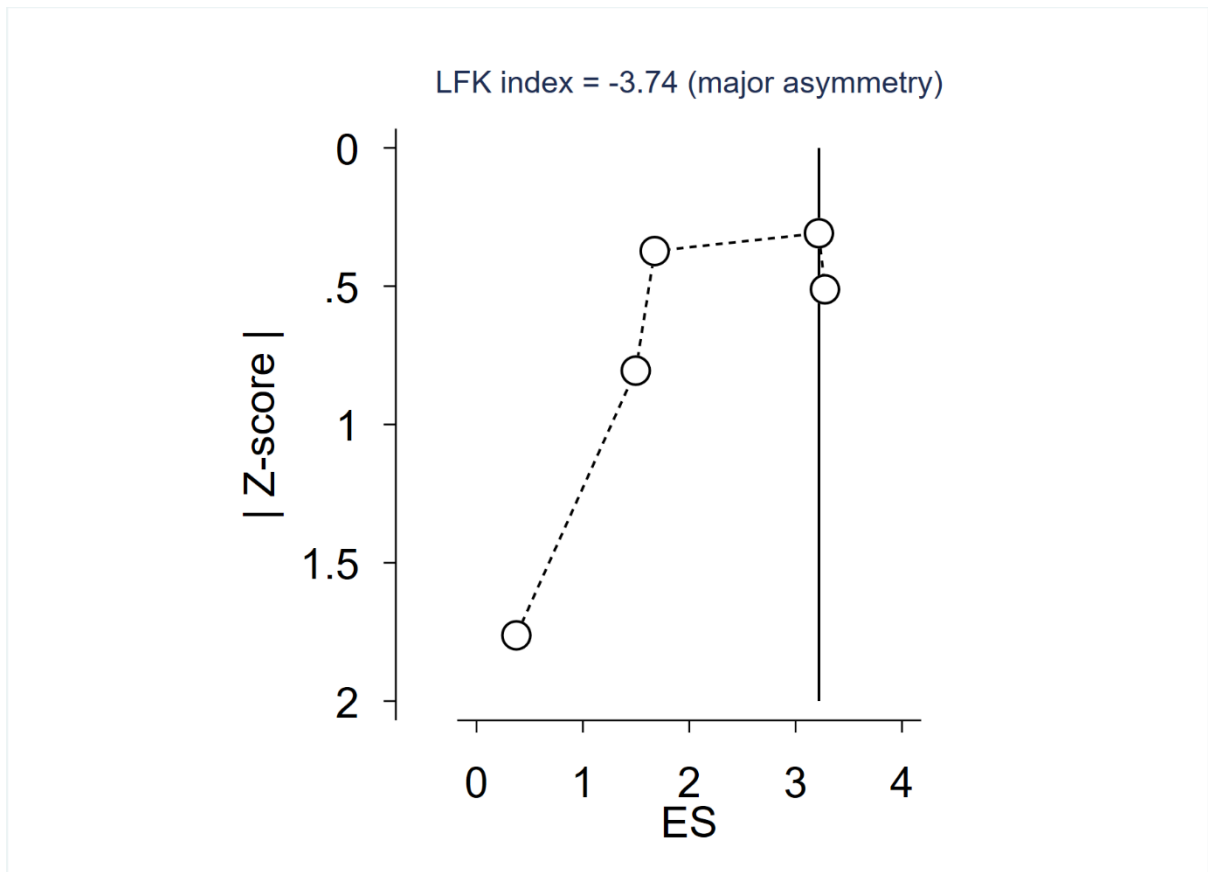

Supplement: mmc1.pdf [file mmc1.pdf]
